# Supplementary material for: Sustainable Agri-Food Processes and Circular Pathways in a Life Cycle Perspectives: Where Is Applicative Research Going?
Source: Preprints.org preprint supplement (doi:10.20944/preprints202102.0034.v1), 2021-02-01
Supplement: Supplementary file 1 [file supplementary]

## Sheet: Table S1
	Table S1. Completed review matrix (84 reviewed articles)
# ID Paper	Authors	Year	Title	Source	Place	Field of application	Main reference product	Circularity topics	Circularity assessment methods		Circularity Indicators			Circular strategy application level	LCA/other LC approaches details				LCC details
											Circularity Indices (measuring the circular degree of a system)	CE assessment indicators (assessing the effects of circularity)
									LC tools and other life cycle approaches	Other		Life cycle based-indicators	Other (no life cycle based)		Functional unit	System boundary	Data/Database	LC impact assessment method and/or software	Approach used	Type of cost	Data
1	Albizzati P.F., Tonini D., Astrup T.F.,	2021	High-value products from food waste: An environmental and socio-economic assessment	Science of the Total Environment, 755, art. no. 142466. DOI: 10.1016/j.scitotenv.2020.142466	Europe	Wastes	Food waste (maize, soybean)	E	LCA, C-LCC and S-LCC	-	-	GWP, human toxicity, non-cancer effects, ionising radiation, photochemical ozone formation, ozone depletion, terrestrial acidification, eutrophication freshwater, marine eutrophication, ecotoxicity, depletion of abiotic resources elements and fossil.	-	-	Wet animal feed scenario: 1 Scandinavian Feed Unit (corresponding to 12.5 MJ of digestible energy) of animal feed. protein-concentrated animal feed scenario: 1 kg of protein. Lactic, polylactic and succinic acid scenarios: 1kg.	Cradle to grave: feedstock provision, transport, treatment processes of the co-products generated and land- use changes associated with biomass provision	Ecoinvent v 3.5	midpoint indicators of the International Reference Life Cycle Data System (ILCD) method. 100 years time horizon.	Unit-cost method approach	Budgets costs, transfers and externalities	Statistic, Literature
2	Albuquerque, TLM; Mattos, CA; Scur, G; Kissimoto, K	2019	Life cycle costing and externalities to analyze circular economy strategy: Comparison between aluminum packaging and tinplate	Journal of Cleaner Production, 234, pp. 477-486. DOI: 10.1016/j.jclepro.2019.06.091	Brazil	Manufacturing	Aluminium and tinplate	A	LCC, Product structure- based integrated life cycle analysis (PSILA), Externalities	-	-	-	-	-	-	-	-	-	Approach proposed by Hunkeler et al. (2008)	Production cost, Overhead Costs and Depreciation	Interviews to stakeholder
3	Arunrat N., Pumijumnong N., Sereenonchai S., Chareonwong U., Wang C.,	2021	Comparison of GHG emissions and farmers’ profit of large-scale and individual farming in rice production across four regions of Thailand	Journal of Cleaner Production, 278, art. no. 123945. DOI: 10.1016/j.jclepro.2020.123945	Thailand	Agriculture	Rice	B	LCA (Carbon footprint)	Net profit calculation, statistical analysis through SPSS	-	GHG emissions, GWP	-	-	kilograms of carbon dioxide equivalents per kilogram of paddy rice at the farm gate (kg CO2eq kg?1 paddy rice) and per kg white milled rice in plastic bags at the factory gate (kg CO2eq kg?1 white mill rice in a plastic bag).	cradle to factory gate was	The National Technical Committee on Product Carbon Footprinting (Thailand) (2011); The National Technical Committee on Product Carbon Footprinting (Thailand) (2019), Thailand Greenhouse Gas Man- agement Organization (Public organization) (TGO, 2014; TGO, 2016), and the Ecoinvent Centre (2015).	IPCC 2006		-	-
4	Babu, S; Mohapatra, KP; Das, A; Yadav, GS; Tahasildar, M; Singh, R; Panwar, AS; Yadav, V; Chandra, P	2020	Designing energy-efficient, economically sustainable and environmentally safe cropping system for the rainfed maize-fallow land of the Eastern Himalayas	Science of the Total Environment, 722, art. no 137874. DOI: 10.1016/j.scitotenv.2020.137874	Eastern Himalaya	Agriculture	Maize	D	Carbon footprint	Financial analysis, energy calculations, statistical analysis	-	GWP	-	-	-	-	-	-	-	-	-
5	Beausang C., McDonnell K., Murphy F.,	2020	Anaerobic digestion of poultry litter – A consequential life cycle assessment	Science of the Total Environment, 735, art. no. 139494. DOI: 10.1016/j.scitotenv.2020.139494	Ireland	Biomass	Poultry	D, F	Consequential LCA	-	-	Global warming potential (GWP), Particulate matter formation potential, terrestrial acidification potential, freshwater eutrophication potential	-	-	One year of biogas plant operation”. The reference flow is 20,000 tonnes of litter.	The system boundaries include operation of the biogas plant (transport of litter, digester and CHP operation, digestate storage and use), the processes displaced by the two co-products (bio- gas and digestate) and the processes displaced by the initial use of the poultry litter (land spreading).	-	openLCA v1.9.0, ReCiPe 2016 method (midpoint level)	-	-	-
6	Belaud J.-P., Prioux N., Vialle C., Sablayrolles C.,	2019	Big data for agri-food 4.0: Application to sustainability management for by-products supply chain	Computers in Industry, 111, pp. 41-50. DOI: 10.1016/j.compind.2019.06.006	France	Biomass	Rice	F	LCA	-	-	18 midpoint indicators and three endpoint indicators (human health, ecosystems, resources)	-	-	the production of 1 g of glucose	cradle-to-gate	Ecoinvent database	ReCiPe 2016 method (midpoint and endpoint level)	-	-	-
7	Blanc, S; Massaglia, S; Brun, F; Peano, C; Mosso, A; Giuggioli, NR	2019	Use of Bio-Based Plastics in the Fruit Supply Chain: An Integrated Approach to Assess Environmental, Economic, and Social Sustainability	Sustainability, 11 (9). DOI: 10.3390/su11092475	Italy (Piedmont)	Manufacturing	Berry fruit	C	LCA, C-LCC and S-LCC	Externalities assessment method	-	Global warming potential (GWP) expressed in kg CO2eq, and non-renewable energy (NRE) use (expressed in primary MJ)	-	-	a 125-g (9.5 × 14.5 × 2.5 cm) flow pack	cradle to grave	Ecoinvent 2.2, LCA Food DK	SimaPro 7.3	Methodological scheme expressed by Gluch and Baumann, 2004, and Neugebauer et. al (2016)	Conventional costs for agricultural operations, Costs incurred for product transformation, sales, consumption, and disposal of waste, Environmental externalities	Face-to-face interviews to different actors
8	Boesen S., Bey N., Niero M.,	2019	Environmental sustainability of liquid food packaging: Is there a gap between Danish consumers' perception and learnings from life cycle assessment?	Journal of Cleaner Production, 210, pp. 1193-1206. DOI: 10.1016/j.jclepro.2018.11.055	Denmark	Manufacturing	Liquid food (milk, beer, soft drink, olive oil and skinned tomatoes)	B, C	LCA	Survey, qualitative interview	-	Global warming potential, abiotic resource depletion potential, acidification potential, freshwater, marine and terrestrial eutrophication potentials, photochemical oxidant for- mation potential, stratospheric ozone depletion potential, human toxicity potential (including both carcinogenic effects and non- carcinogenic effects) and freshwater eco-toxicity potential, partic- ulate matter/respirato…	-	-	containment of 1 hl of beverage	cradle to cradle (the production of the content (i.e. beer and soft drink) and the use phase (e.g. refrigeration) were excluded)	Ecoinvent 2.2 database	Instant LCA Packaging™ v1.12.1, ILCD 2011 method		-
9	Buonocore E., Paletto A., Russo G.F., Franzese P.P.,	2019	Indicators of environmental performance to assess wood-based bioenergy production: A case study in Northern Italy	Journal of Cleaner Production, 221, pp. 242-248. DOI: 10.1016/j.jclepro.2019.02.272	Italy (Trentino Alto-Adige)	Biomass	Wood	F	LCA	-	-	Climate change (GWP), fossil depletion (FD), freshwater ecotoxicity (FEP), human toxicity (HTP), photochemical oxidant formation (POFP), particulate matter formation (PMFP), terrestrial acidification (TAP), and water depletion (WD)	-	-	1 kWh of delivered exergy	cradle to gate	Ecoinvent database	ReCiPe method (midpoint level)	-	-	-
10	Campos I., Pinheiro Valente L.M., Matos E., Marques P., Freire F.,	2020	Life-cycle assessment of animal feed ingredients: Poultry fat, poultry by-product meal and hydrolyzed feather meal	Journal of Cleaner Production, 252, art. no. 119845. DOI: 10.1016/j.jclepro.2019.119845	Portugal	Livestock or poultry	Poultry	A, D	LCA	-	-	Global warming (GW), abiotic depletion (AD), acidification (AC) and eutrophication (EUT).	-	-	1 ton	cradle to gate	Ecoinvent database	CML method	-	-	-
11	Casarejos, F; Bastos, CR; Rufin, C; Frota, MN	2018	Rethinking packaging production and consumption vis-a-vis circular economy: A case study of compostable cassava starch-based material	Journal of Cleaner Production, 201, pp. 1019-1028. DOI: 10.1016/j.jclepro.2018.08.114	Brazil	Manufacturing	Cassava starch	B, C, F	LCI (inventory analysis)	-	-	Energy use, GHG emissions, water use	-	-	1 meric ton for plastic packaging	cradle to cradle	primary and secondary data	-	-	-	-
12	Cascone S., Ingrao C., Valenti F., Porto S.M.C.,	2020	Energy and environmental assessment of plastic granule production from recycled greenhouse covering films in a circular economy perspective	Journal of Environmental Management, 254, art. no. 109796. DOI: 10.1016/j.jenvman.2019.109796	Italy (Sicily)	Manufacturing	Plastic films	B	LCA	-	-	Carbon footprint, Cumulative Energy Demand, Water footprint	-	-	1 ton recycled LDPE	1) APW acquisition, pre-treatment and transformation into the reference finished-product (1 ton recycled-LDPE); 2) preparation and acquisition of auxiliaries, oils, and energy; 3) the treatments of all waste materials as generated by the recycling process; and 4) the annexed plant for treatment and recirculation of the APW-cleaning water	Primary data, Ecoinvent database	SimaPro 8.1, ReCiPe (endpoint level) + IPCC 2013 GWP 100a	-	-	-
13	Casson A., Giovenzana V., Tugnolo A., Fiorindo I., Beghi R., Guidetti R.,	2020	Environmental impact of a new concept of food service: A case study for the re-use of naval shipping containers	Journal of Cleaner Production, 274, art. no. 122912. DOI: 10.1016/j.jclepro.2020.122912	Italy (Lombardy)	Ho.Re.Ca and other forms of food distribution and consumption	Street food	C	LCA	Principal Components Analysis carried out on Matlab® environment, version R2017b (The MathWorks, Inc) and using the PLS Toolbox, version 8.7.1 2019	-	Climate change Ozone depletion, Human toxicity, Non-cancer effects Human toxicity, cancer effects, Particulate matter, Ionizing radiation, Photochemical ozone formation, Acidification, Terrestrial eutrophication, Freshwater eutrophication Marine eutrophication Freshwater ecotoxicity, Land use, Water resource depletion, Mineral, fossil & ren resource depletion	-	-	a dish of pasta (100 g), one sandwich (150 g) and one portion of fries (200 g)	-	Ecoinvent 3.5 database	SimaPro 9, ILCD 2011 midpoint method	-	-	-
14	Chaudron, C; Faucher, M; Bazinet, L; Margni, M	2019	The cost is not enough - An alternative eco-efficiency approach applied to cranberry de-acidification	Journal of Cleaner Production, 232, pp. 391-399. DOI: 10.1016/j.jclepro.2019.05.261	Canada	Food products	Cranberry juice	E	LCA	-	-	Climate change, ecosystem quality, human health, resources	-	-	1000 L of cranberry juice	cradle to gate	Ecoinvent 3.4 database	Open LCA, IMPACT 2002 + method	-	-	-
15	Chen W., Oldfield T.L., Cinelli P., Righetti M.C., Holden N.M.,	2020a	Hybrid life cycle assessment of potato pulp valorisation in biocomposite production	Journal of Cleaner Production, 269, art. no. 122366. DOI: 10.1016/j.jclepro.2020.122366	China	Biochemical products, biocomposite products, nutrients	Potato	D	Hybrid LCA combining process-based LCA with input- output (IO) analysis	-	-	GHG emissions, GWP	-	-	1 kg biocomposite		multi-regional input-output database EXIOBASE, Ecoinvent		-	-	-
16	Chen W., Oldfield T.L., Katsantonis D., Kadoglidou K., Wood R., Holden N.M.,	2019	The socio-economic impacts of introducing circular economy into Mediterranean rice production	Journal of Cleaner Production, 218, pp. 273-283. DOI: 10.1016/j.jclepro.2019.01.334	Greece	Agriculture	Rice	B	Hybrid LCA combining process-based LCA with input- output (IO) analysis	Socio-economic assessment	-	not mentioned	-	-	one tonne of paddy rice for environmenta analysis, 1 million euro for GVA, 1000 persons as unit of employment	full system boundary	Ecoinvent, multi-regional input-output database EXIOBASE	-	-	-	-
17	Chen W., Oldfield T.L., Patsios S.I., Holden N.M.,	2020b	Hybrid life cycle assessment of agro-industrial wastewater valorisation	Water Research, 170, art. no. 115275. DOI: 10.1016/j.watres.2019.115275	-	Wastes	Fruit juice (peach, apple, kiwi)	B, E	IO analysis with Exiobase	-	-	Climate change	-	-	1m3 wastewater treated by the WWTP fa- cility working at half capacity		Ecoinvent, Agri-footprint database		-	-	-
18	Cobo S., Dominguez-Ramos A., Irabien A.,	2018a	Trade-Offs between Nutrient Circularity and Environmental Impacts in the Management of Organic Waste	Environmental Science and Technology, 52 (19), pp. 10923-10933. DOI: 10.1021/acs.est.8b01590	Spain	Biochemical products, biocomposite products, nutrients	Corn	E	MFA and modular LCA	Multi-objective optimization	Carbon circularity indicator (CIC); Nitrogen circularity indicator (CIN); Phosphorus circularity indicator (CIP)	Global warming, marine eutrophication and freshwater eutrophication	-	Micro	the area available to grow corn in Cantabria (4810 ha)	The direct substitution method was applied by expanding the system boundaries to include the generation of electricity from the Spanish grid mix. A 100% substitution ratio was assumed	-	EASETECH (Environmental Assessment System for Environmental TECHnologies) 2.3.6 and GAMS (General Algebraic Modeling System) 24.8.1; DNDC (DeNitrification-DeComposition)	-	-	-
19	Cobo S., Fengqi Y., Dominguez-Ramos A., Irabien A.,	2020	Noncooperative game theory to ensure the marketability of organic fertilizers within a sustainable circular economy	ACS Sustainable Chemistry and Engineering, 8 (9), pp. 3809-3819. DOI: 10.1021/acssuschemeng.9b07108	Spain	Wastes	Corn and wheat	E	LCA and LCC	Game-Theoretical Model (Stackelberg game)	-	Global warming impacts (GWIs); capital costs	-	-	the area that must be annually fertilized to meet the nutrient requirements of the two most cultivated crops in Cantabria, corn and wheat.	cradle to gate	Ecoinvent 3.3, primary and secondary data	ReCiPe 1.11, EASETECH 2.3.6, denitrification−decom- position (DNDC) 9.5 simulation model	Economic model derived from Solid Waste Optimization Lifecycle Framework (SWOLF)	Capital costs of the unit processes, Costs associated with the farmers’ equipment and land	Data from SWOLF
20	Cobo S., Levis J.W., Dominguez-Ramos A., Irabien A.,	2019	Economics of Enhancing Nutrient Circularity in an Organic Waste Valorization System	(2019) Environmental Science and Technology, 53 (11), pp. 6123-6132. DOI: 10.1021/acs.est.8b06035	Spain	Wastes	Corn	E	MFA, LCA and LCC	GAMS 24.7.1 (General Algebraic Modeling System)25 and optimized with the CPLEX solver.	-	GWI	-	-	LCA: the area available in Cantabria for corn production that is fertilized annually via any of the k corn production unit processes. LCC results are referenced to the flow of OW processed annually (83 544 t·year−1	cradle to gate. In LCC corn production is excluded.	-	ReCiPe 1.11, EASETECH 2.3.6, denitrification−decom- position (DNDC) 9.5 simulation model	Economic model derived from Solid Waste Optimization Lifecycle Framework (SWOLF)	Waste management costs	Data from SWOLF, literature
21	Cobo, S; Dominguez-Ramos, A; Irabien, A	2018b	Minimization of Resource Consumption and Carbon Footprint of a Circular Organic Waste Valorization System	ACS SUSTAINABLE CHEMISTRY & ENGINEERING, 6 (3), pp. 3493-3501. DOI: 10.1021/acssuschemeng.7b03767	Spain	Wastes	Corn	A, E	MFA and LCA	GAMS 24.7.1 (General Algebraic Modeling System)25 and optimized with the CPLEX solver.	-	GWI, carbon footprint	-	-	the area available to grow corn in Cantabria (4810 ha)	the system boundaries to includes the generation of electricity from the Spanish grid mix.	-	ReCiPe 1.11, EASETECH 2.3.6, denitrification−decom- position (DNDC) 9.5 simulation model	-	-	-
22	Colley T.A., Birkved M., Olsen S.I., Hauschild M.Z.,	2020	Using a gate-to-gate LCA to apply circular economy principles to a food processing SME	Journal of Cleaner Production, 251, art. no. 119566. DOI: 10.1016/j.jclepro.2019.119566	Australia	Food products	Meat	F	LCA	-	-	Climate change; minerals resource depletion; fossil fuels resource depletion; consumptive water use; eutrophication; acidification; human toxicity; ecotoxicity; photochemical ozone formation; particulate matter for- mation; ozone depletion; and ionizing radiation	-	-	1 tonne of hot standard carcass weight (HSCW) at	gate to gate	Ecoinvent 3.2	ReCiPe (endpoint level) + CML+ TRACI + USETOX methods	-	-	-
23	Corcelli F., Fiorentino G., Petit-Boix A., Rieradevall J., Gabarrell X.,	2019	Transforming rooftops into productive urban spaces in the Mediterranean. An LCA comparison of agri-urban production and photovoltaic energy generation	(2019) Resources, Conservation and Recycling, 144, pp. 321-336. DOI: 10.1016/j.resconrec.2019.01.040	Spain	Agriculture	Tomato	C	LCA	-	-	Climate Change, Ozone Depletion, Terrestrial Acidification, Freshwater Eutrophication, Photochemical Oxidation Formation, Terrestrial Ecotoxicity, Water Depletion, Metal Depletion and Fossil Depletion	-	-	1m2 of flat rooftop	cradle to grave	Ecoinvent 3.1	SimaPro 8.0.5, ReCiPe Midpoint method	-	-	-
24	Cortés A., Oliveira L.F.S., Ferrari V., Taffarel S.R., Feijoo G., Moreira M.T.,	2020	Environmental assessment of viticulture waste valorisation through composting as a biofertilisation strategy for cereal and fruit crops	Environmental Pollution, 264, art. no. 114794. DOI: 10.1016/j.envpol.2020.114794	Brazil	Wastes	Viticulture	B, E	LCA	-	-	Global Warming (GW), Ozone Formation (OF), Terrestrial Acidification (TA), Freshwater Eutrophication (FE), Terrestrial Ecotoxicity (TET Andersen et al., 2010), Freshwater Ecotoxicity (FET), Human Toxicity (HT) and Mineral Resource Scarcity (MRS).	-	-	One tonne of feedstock mixture fed to the composting facilities	cradle to grave	Ecoinvent 3.5	SimaPro 9.0, ReCiPe 2016 method (midpoint level)	-	-	-
25	Cristóbal J., Castellani V., Manfredi S., Sala S.,	2018	Prioritizing and optimizing sustainable measures for food waste prevention and management	Waste Management, 72, pp. 3-16. DOI: 10.1016/j.wasman.2017.11.007	Italy	Wastes	Food waste (grain, meat, fruit and vegetables, milk/dairy and seafood)	A	LCA	Integer linear pro- gramming (ILP) model, i.e. multi- objective optimization ILP (MOILP). The MOILP model was implemented in the modeling system GAMS 24.7.1 and solved using CPLEX	-	Climate change, Ozone depletion, Human toxicity, non-cancer effects, Human toxicity, cancer effects, Particulate matter, Ionizing radiation, human health, Photochemical ozone formation, Acidification, Eutrophication terrestrial, Eutrophication freshwater, Eutrophication marine, Ecotoxicity freshwater, Land use, Resource depletion water, Resource depletion, mineral, fossils	-	-	one kg of product	cradle to grave	Ecoinvent 3.2	ILCD method	-	-	-
26	de Sadeleer I., Brattebø H., Callewaert P.,	2020	Waste prevention, energy recovery or recycling - Directions for household food waste management in light of circular economy policy	Resources, Conservation and Recycling, 160, art. no. 104908. DOI: 10.1016/j.resconrec.2020.104908	Norway	Wastes	Food waste (bread and pastries, fruits and vegetables, meat, fish, dairy, eggs)	A, B, F	LCA and MFA	-	-	Recycling rates, energy eﬃciency, avoided GHG emissions indicator	-	-	Authors say "The functional unit is based on a food waste composition analysis for this city"	Upstream (food production) and Downstream (waste treatment)	Waste samples of 400–500 kg from ﬁve diﬀerent residential areas were collected, reﬂecting the social-demographic diﬀerences of the city. Literature review	Literature review	-	-	-
27	Edwards J., Othman M., Crossin E., Burn S.,	2017	Life cycle inventory and mass-balance of municipal food waste management systems: Decision support methods beyond the waste hierarchy	Waste Management, 69, pp. 577-591. DOI: 10.1016/j.wasman.2017.08.011	Australia	Wastes	Food waste	B	LCA and Mass Balance	-	-	Net energy balance, Water Balance, Air water and soil emissions	-	-	‘the management and treatment of the annual quantity of MGB and MOB waste collected by the local government, and the annual quantity of sewage sludge treated by the local WWTP.”	The LCA system boundary incorporated the entire waste management service provision and was divided into four distinct unit process stages; collection, pre-treatment, treatment, and enduse/disposal.	Foreground data was obtained from primary sources including local water utilities and waste managers during technical visits and correspondence. Where foreground data was not available averaged secondary data was obtained from enterprises with the same or similar processes operating outside the case study area, literature sources, or from industry representatives. Ecoinvent (version 3.1, attribut…	Life Cycle Inventory analisys	-	-	-
28	Eggemann L., Escobar N., Peters R., Burauel P., Stolten D.,	2020	Life cycle assessment of a small-scale methanol production system: A power-to-fuel strategy for biogas plants	Journal of Cleaner Production, 271, art. no. 122476. DOI: 10.1016/j.jclepro.2020.122476	Germany	Biomass	Cattle manure and straw residues	F	LCA	-	-	CC: climate change, FD: fossil depletion, EP: eutrophication potential, HT: human toxicity, POF: photochemical ozone formation, ODP: stratospheric ozone depletion, AP: acidiﬁcation potential.	-	-	1 kg of methanol produced by a PtF plant	Cradle to gate	LCI data for the main processes at the foreground level was collected from own measurements, as combined with technical process parameters for the biogas and methanol plants. LCI data was taken from the process in Ecoinvent 3.5	GaBi Life Cycle Engineering Suite, ReCiPe 2016 method (midpoint level)	-	-	-
29	Gaglio M., Tamburini E., Lucchesi F., Aschonitis V., Atti A., Castaldelli G., Fano E.A.,	2019	Life cycle assessment of maize-germ oil production and the use of bioenergy to mitigate environmental impacts: A gate-to-gate case study	Resources, 8 (2), art. no. 60. DOI: 10.3390/resources8020060	Italy (Emilia Romagna)	Food products	Maize-germ oil	F	LCA	-	-	Abiotic Resource Depletion (AD), Abiotic Resource Depletion (AD fossil fuels), Global Warming Potential with a period of 100 years, ,Ozone Layer Depletion Potential (ODP) ,Human toxicity (HT), Freshwater aquatic ecotoxicity (FWE), Marine aquatic ecotoxicity (MAE), Terrestrial ecotoxicity (TE), Photochemical Ozone Creation Potential (POCP), Acidiﬁcation Potential (AP), Eutrophication Potential (EP…	-	-	1 ton of output maize reﬁned oil	Gate-To-Gate. The analysis neither considered the impacts produced upstream the industrial transformation	The data requirements for this analysis were directly collected from the company Tampieri spa, for the year 2015 (Secondary data sources for background processes is not declared)	SimaPro 8.02, CML-IA baseline method	-	-	-
30	Ghisellini P., Protano G., Viglia S., Gaworski M., Setti M., Ulgiati S.,	2014	Integrated agricultural and dairy production within a circular economy framework. A comparison of Italian and Polish farming systems	Journal of Environmental Accounting and Management, 2 (4), pp. 367-384. DOI: 10.5890/JEAM.2014.12.007	Italy and Poland	Food products	Dairy	F	Material Flow Accounting, Cumulative Energy Demand, Emergy Accounting and LCA	-	-	Global warming potential , Acidification potential , Eutrophication potential, Cumulative Energy Demand	-	-	g of milk?	Cradle to gate	Data about inputs used in the two dairy farms have been collected through direct interviews to the owners. Inputs are referred to the years 2010 (Scenario 2) and 2011 (Scenarios 3 and 4) for the Italian farm and to the year 2011 for the Polish farm.	CML2 baseline 2000 method	-	-	-
31	Hadin Å., Hillman K., Eriksson O.,	2017	Prospects for increased energy recovery from horse manure - A case study of management practices, environmental impact and costs	Energies, 10 (12), art. no. 1935. DOI: 10.3390/en10121935	Sweden	Biomass	Horse manure	F	LCA approach based on MFA	Simplified cost analisys	-	Cumulative energy demand, CED, global warming potential (GWP), eutrophication potential (EP) and acidiﬁcation potential (AP)	-	-	4179 tonnes of manure/year	Gate to gate and Gate to grave	A telephone questionnaire was used to explore horse manure amounts, characteristics and practices. Compilation and calculations of horse manure data were performed in MS Excel, while the horse manure treatment methods were simulated in ORWARE	ORWARE , CML 2001 Baseline	-	-	-
32	Hoehn, D; Margallo, M; Laso, J; Garcia-Herrero, I; Bala, A; Fullana-i-Palmer, P; Irabien, A; Aldaco, R	2019	Energy Embedded in Food Loss Management and in the Production of Uneaten Food: Seeking a Sustainable Pathway	Energies, 12 (4), 767. DOI: 10.3390/en12040767	Spain	Biomass	Food (eggs, meat, ﬁsh and seafood, dairy, cereals, sweets, pulses, vegetable oils, vegetables, fruits and roots)	F	Life Cycle Assessment approach, MFA, Energy ﬂow analysis	-	Energy return on investment – Circular economy index (EROI)	Primary Energy Demand (PED)	-	Micro	daily intake of an 11,493 kJ per capita and per day diet, by a Spanish citizen for 2015	The system boundaries includes the steps of agricultural production, processing and packaging, distribution and consumption, being therefore realised from “cradle to consumer”	Data for 48 representative commodities were sourced from the consumption database of the Spanish Department of Agriculture and Fishery, Food and Environment	Gabi software and database	-	-	-
33	Keng Z.X., Chong S., Ng C.G., Ridzuan N.I., Hanson S., Pan G.-T., Lau P.L., Supramaniam C.V., Singh A., Chin C.F., Lam H.L.,	2020	Community-scale composting for food waste: A life-cycle assessment-supported case study	Journal of Cleaner Production, 261, art. no. 121220. DOI: 10.1016/j.jclepro.2020.121220	Malaysia	Wastes	Food waste	B, E	LCA	AHP	-	Ozone depletion, Global warming, Smog, Acidiﬁcation, Eutrophication, Carcinogenics, Non-carcinogenic,s Respiratory effects, Ecotoxicity, Fossil fuel depletion	-	-	Continuous treatment of 200 kg/day of organic wastes	From the organic material collection, storage in the reception area of the facilities, to the compost production and waste disposal at a landﬁll.	The data used were predominantly primary and referred to the year 2018. Ecoinvent 3.0	Simapro 9.0, TRACI 2.0 method	-	-	-
34	Krishnan R., Agarwal R., Bajada C., Arshinder K.,	2020	Redesigning a food supply chain for environmental sustainability – An analysis of resource use and recovery	Journal of Cleaner Production, 242, art. no. 118374. DOI: 10.1016/j.jclepro.2019.118374	India	Food products	Mango	A	LCA	-	-	Global warming potential (GWP100a), human toxicity (HT), fresh water aquatic ecotoxicity (FW), marine aquatic ecotoxicity (MAE), terrestrial ecotoxicity (TE), photochemical oxidation (PO), acidiﬁcation (AC) and eutrophication (EU).	-	-	A pack containing 215 kg mango pulp is considered as the functional unit	Cultivation, processing, packaging and transportation stages of the supply chain	Primary data from mango farmers and Ecoinvent Database v3.4	SimaPro (Version 8.4), CML-IA method	-	-	-
35	Lansche J., Awiszus S., Latif S., Müller J.,	2020	Potential of biogas production from processing residues to reduce environmental impacts from cassava starch and crisp production-a case study from Malaysia	Applied Sciences (Switzerland), 10 (8), art. no. 2975. DOI: 10.3390/APP10082975	Malaysia	Biomass	Cassava starch	F	LCA	-	-	Cumulated energy demand (CED), deforestation (DEF), water stress index (WSI) global warming potential (GWP), photochemical ozone formation potential (OFP), acidiﬁcation potential (AP), human toxicity potential (HTP) and aquatic ecotoxicity potential (ETP)	-	-	1 kg starch output	from cradle to factory gate	Primary data for cultivation .Ecoinvent 3.5	Simapro 9.0	-	-	-
36	Laso J., García-Herrero I., Margallo M., Vázquez-Rowe I., Fullana P., Bala A., Gazulla C., Irabien Á., Aldaco R.,	2018a	Finding an economic and environmental balance in value chains based on circular economy thinking: An eco-efficiency methodology applied to the fish canning industry	Resources, Conservation and Recycling, 133, pp. 428-437. DOI: 10.1016/j.resconrec.2018.02.004	Spain	Wastes	Anchovy	D	LCA and LCC	-	-	Global Warming Potential, Acidiﬁcation Potential, Eutrophication Potential, ReCiPe Single Score, Value added (VA) indicator, Eco-eﬃciency index (EEI)	-	Micro	1 kg of fresh anchovy captured in the ﬁshing stage	Valorisation of heads and spines: (i) heating, (ii) pressing, (iii) separation of the liquid phase into oil and water (stickwater), (iv) evaporation of the stickwater into a concentrate, (v) drying of the solid material (presscake), (vi) grinding of the dried material and (vii) storage. Manufacture of anchovy paste conducted in the canning factory: (i) addition, (ii) homogenisation, (iii) grindin…	Ecoinvent 3.1 and PE GaBi	Gabi 6.0, CML-IA and recipe endpoint	Approaches described by Hunkeler et al. (2007) and Swarr et al. (2011)	Costs of raw materials, Costs of anchovy processing and manufacturing, Costs of packaging, Management costs of waste treatment, Value added	Literature, market reports and factory information
37	Laso J., Margallo M., Celaya J., Fullana P., Bala A., Gazulla C., Irabien A., Aldaco R.,	2016	Waste management under a life cycle approach as a tool for a circular economy in the canned anchovy industry	Waste Management and Research, 34 (8), pp. 724-733. DOI: 10.1177/0734242X16652957	Spain	Wastes	Anchovy	E, F	LCA	Linear Programming	-	Water consumption (W), energy consumption (Ec), Food (Pc) and Climate (Cei).	-	-	1 t of anchovy FL	From waste generation to utilization as bass food	PE GaBi database	Gabi, IChemE, 2002 metrics		-
38	Laso J., Margallo M., García-Herrero I., Fullana P., Bala A., Gazulla C., Polettini A., Kahhat R., Vázquez-Rowe I., Irabien A., Aldaco R.,	2018b	Combined application of Life Cycle Assessment and linear programming to evaluate food waste-to-food strategies: Seeking for answers in the nexus approach	Waste Management, 80, pp. 186-197. DOI: 10.1016/j.wasman.2018.09.009	Spain	Food products	Anchovy	E, F	LCA	Linear Programming	-	Natural resources (NR) and EBs. NRs includes the consumption of energy (X1,1) (MJ), materials (X1,2) (kg) and water (X) (kg) forthe considered process/product, and it can be described by an NR dimensionless index X1. Atmospheric acidification (AA), global warming (GW), human health (carcinogenic) effects (HHE), stratospheric ozone depletion (SOD), photochemical ozone (smog) formation (POF), aquat…	-	-	1 t of anchovy wastes entering the flour plant. 1 t of anchovy meat entering the paste processing.	Cradle to gate approach	PE and BUWAL databases	Gabi 6.0, EROI method	-	-	-
39	Laso J., Margallo M., Serrano M., Vázquez-Rowe I., Avadí A., Fullana P., Bala A., Gazulla C., Irabien Á., Aldaco R.,	2018c	Introducing the Green Protein Footprint method as an understandable measure of the environmental cost of anchovy consumption	Science of the Total Environment, 621, pp. 40-53. DOI: 10.1016/j.scitotenv.2017.11.148	Spain	Food products	Anchovy	E	LCA and Life Cycle Protein Assessment (LCPA)	-	-	CML IA baseline method to calculate acidiﬁcation potential (AP) and eutrophication potential(EP); ReCIPE endpoint method was used by means of the aggregated endpoint single score (SS); Green protein footprint (GPF) index	-	-	1 kg of fresh, round European anchovy processed and consumed in the region of Cantabria	from cradle to grave	Ecoinvent 3.1 and PE GaBi	Gabi 6.0, CML-IA and recipe endpoint, IPCC 2013 100y	-	-	-
40	Laurenti R., Martin M., Stenmarck Å.,	2018	Developing adequate communication of waste footprints of products for a circular economy-A stakeholder consultation	Resources, 7 (4), art. no. 78. DOI: 10.3390/resources7040078	Global	Wastes	Chicken, beef, milk and other no-food goods	A	LCA-based waste footprint metric	-	-	Product Waste Footprint (PWF)	-	-	1 kg of boneless chicken meat; 1 kg of boneless beef; 1 kg of fat and protein corrected milk; Typical laptop computer from a leading producer, weight 3 kg; smart phone from a leading producer, weight 0.169 g, 5.5 in screen; Pair of cotton trousers, weight 450 g; Polyester sports t-shirt and pair of shorts for training, weight 300 g; Pair of leather shoes, weight 800 g; Beverage package weight 39 …	Cradle to gate analysis	Ecoinvent 3 database	Gabi software	-	-	-
41	Li, LY; Li, X; Chong, C; Wang, CH; Wang, XN	2020	A decision support framework for the design and operation of sustainable urban farming systems	Journal of Cleaner Production, 268, art. no 121928. DOI: 10.1016/j.jclepro.2020.121928	Singapore	Agriculture	Crop	E	Energy model and Material flow model	Economic analysis: net present value (NPV), return on investment (ROI) and payback period; Mixed integer nonlinear programming (MINLP)	-	Water consumption, land occupation, and CO2 emission	-	-	1 kg of crop production	Cradle-to-gate: from resource extraction (cradle) to the end of the vegetable production process (gate)	Ecoinvent database version 3.5	General Algebraic Modeling System (GAMS) software; BARON solver.	-	-	-
42	Liu H., Ou X., Yuan J., Yan X.,	2018	Experience of producing natural gas from corn straw in China	Resources, Conservation and Recycling, 135, pp. 216-224. DOI: 10.1016/j.resconrec.2017.10.005	China	Biomass	Corn straw	D, F	LCA	Economic analysis: net present value (NPV), internal rate of return (IRR) and payback period	-	Life-cycle fossil primary energy consumption and GHG emissions	-	-	FU is a compound unit, which include energy and fertilizer services provided by Bio-natural gas and organic fertilizer in a year from the system.	Energy inputs include diesel fuel in the transport phase and electricity in the production phase. The outputs include bio-natural gas for domestic and vehicle customers and the fertilizer byproduct.	Literature, On-site survey, Previous studies by the authors.	Different methods for the calculation of life-cycle fossil primary energy and GHG emissions.	-	-	-
43	Lokesh K., Matharu A.S., Kookos I.K., Ladakis D., Koutinas A., Morone P., Clark J.,	2020	Hybridised sustainability metrics for use in life cycle assessment of bio-based products: Resource efficiency and circularity	Green Chemistry, 22 (3), pp. 803-813. DOI: 10.1039/c9gc02992c	-	Manufacturing	Corn and sugar-beet	C	LCA	-	Hazardous chemical use, Circular-process Feedstock intensity (CPFI), Circular-process waste factor (CPWF), Process material circularity (PMC), Product renewability (PR),Circular-process energy intensity (CPEI).	Global warming potential (GWP100), Respiratory inorganics, Human toxicity, Cancer, Acidification, Terrestrial and freshwater, Freshwater eutrophication, Water scarcity, Fossil resource depletion.	-	Micro	1 ha of mulched agricultural land; 1 packaging film that is 350 mm × 250 mm with a thickness of 0.05 mm.	Gate-to-gate	The process inventory was screened against the known databases (SINLIST and SUBSPORT) for hazardous chemicals.	IPCC GWP + UNEP model + Accumulated exceedance model + EUTREND model - ReCIPe 2008 + USEtox model + CML 2002 + AWARE methods	-	-	-
44	Lucchetti M.G., Paolotti L., Rocchi L., Boggia A.,	2019	The Role of Environmental Evaluation within Circular Economy: An Application of Life Cycle Assessment (LCA) Method in the Detergents Sector	Environmental and Climate Technologies, 23 (2), pp. 238-257. DOI: 10.2478/rtuect-2019-0066	Italy (Marche and Lombardy)	Manufacturing	Ecological detergent	E	LCA	-	-	Carcinogens, Respiratory Organics, Respiratory Inorganics, Climate Change, Radiation, Ozone Layer, Ecotoxicity, Acidification/Eutrophication, Land Use, Minerals, Fossil Fuels	-	-	1 tonne of soap from recovered oils	Cradle to gate: from the production of initial inputs to the final product, omitting the phases of bottling and distribution	Supplied directly by the companies, Statistics, Ecoinvent database	SimaPro 8 software, EcoIndicator 99 method	-	-	-
45	Martin M., Poulikidou S., Molin E.,	2019	Exploring the environmental performance of urban symbiosis for vertical hydroponic farming	Sustainability (Switzerland), 11 (23), art. no. 6724. DOI: 10.3390/su11236724	Stockholm	Agriculture	Brewers’ spent grains	E	LCA	-	-	Global warming potential (GWP100), AP-acidiﬁcation potential , EP-eutrophication potential, Human Toxicity, ABD-depletion of abiotic resources-fossil fuels	-	-	Annual production of basil available to consumers in a pot with growing medium and packaging (i.e., 60,000 plants)	Cradle to gate	Literature, Ecoinvent database	OpenLCA software, CML 2014 method	-	-	-
46	Martinez, S; Alvarez, S; Capuano, A; Delgado, MD	2020	Environmental performance of animal feed production from Camelina sativa (L.) Crantz: Influence of crop management practices under Mediterranean conditions	Agricultural Systems, 177, art. no. 102717. DOI: 10.1016/j.agsy.2019.102717	Spain	Agriculture	Camelina sativa (L.) Crantz	B, D	LCA	-	-	Climate change, human toxicity, terrestrial acidiﬁcation, freshwater eutrophication, terrestrial eutrophication, and abiotic depletion.	-	-	1 tonne of camelina feed	Cradle to gate: the processes of packaging, distribution, and consumption of animal feed are excluded	Experimental ﬁeld tests, Literature, Ecoinvent Database v.3	SimaPro 8.0.5. software, EFE-So 2015 software, ILCD 2011 Midpoint +	-	-	-
47	Monsiváis-Alonso R., Mansouri S.S., Román-Martínez A.,	2020	Life cycle assessment of intensified processes towards circular economy: Omega-3 production from waste fish oil	Chemical Engineering and Processing - Process Intensification, 158, art. no. 108171. DOI: 10.1016/j.cep.2020.108171	Mexico	Wastes	Fish oil	E	LCA	Process intensification (PI), MINLP- Mixed-integer nonlinear programming, Multiobjective optimization: epsilon constraint (ε-constraint) method	-	End HH = Human Health endpoint indicator, End ES = Ecosystems damage endpoint indicator, End RD = Resource Depletion endpoint indicator	-	-	-	-	Literature, in-house database	MATLAB®, GAMS® softwares, ReCiPe 2016 method	-	-	-
48	Moreno, VC; Iervolino, G; Tugnoli, A; Cozzani, V	2020	Techno-economic and environmental sustainability of biomass waste conversion based on thermocatalytic reforming	Waste Management, 201, pp. 106-115. DOI: 10.1016/j.wasman.2019.10.002	Italy	Biomass	Olive	E, F	Mass and energy balances, Global warming potential (GWP) approach	Economic analysis: Net Present Value (NPV), Internal Rate of Return (IRR)	-	Fossil, biogenic, and total CO2 emissions	-	-	-	-	Literature, European reference Life Cycle Database, Ecoinvent Database version 3.3	Mass and energy balances	-	-	-
49	Muradin M., Joachimiak-Lechman K., Foltynowicz Z.,	2018	Evaluation of eco-efficiency of two alternative agricultural biogas plants	Applied Sciences (Switzerland), 8 (11), art. no. 2083. DOI: 10.3390/app8112083	Poland	Biomass	Maize, rye and livestock manure	E, F	LCA, Eco-Efﬁciency Analysis	Levelized Cost of Electricity (LCOE) method	-	Eco-efﬁciency indicator of product system	-	-	1 MWh of electricity	The system boundaries included energy crops, providing feedstock including transport, energy production, storage and application of distiller. The construction and demolition of biogas plants, as well as the generation of waste substrates, were excluded from the studies.	Empirical data, Literature, Ecoinvent database	Impact 2002+method	-	-	-
50	Niero M., Kalbar P.P.,	2019	Coupling material circularity indicators and life cycle based indicators: A proposal to advance the assessment of circular economy strategies at the product level	Resources, Conservation and Recycling, 140, pp. 305-312. DOI: 10.1016/j.resconrec.2018.10.002	UK and India	Manufacturing	Beer	B	LCA	Multi Criteria Decision Analysis (MCDA), TOPSIS method	Material Reutilization Score (MRS), Material Circularity Indicator (MCI)	Climate Change (CC), Abiotic Resource Depletion (ARD), Acidiﬁcation (AC), Particulate Matter (PM), Water Consumption (WC)	-	Micro	1 hectolitre (hl) of beer	System boundaries were limited to the production of primary packaging, excluding the transport between diﬀerent stage of life cycle (producer, consumer, recycler).	Primary data, Literature, InstantLCA Tool based on Eurostat data.	Instant LCA Packaging™ version 1.15.2 software, ILCD method	-	-	-
51	Noya I., Aldea X., González-García S., M. Gasol C., Moreira M.T., Amores M.J., Marín D., Boschmonart-Rives J.,	2017	Environmental assessment of the entire pork value chain in Catalonia – A strategy to work towards Circular Economy	Science of the Total Environment, 589, pp. 122-129. DOI: 10.1016/j.scitotenv.2017.02.186	Spain	Livestock or poultry	Pig	C, E	LCA	-	-	Terrestrial acidiﬁcation (TA), Freshwater eutrophication (FE), Marine eutrophication (ME), Human toxicity (HT), Photochemical oxidant formation (POF), Particulate matter formation (PMF), Terrestrial ecotoxicity (TEC), Freshwater ecotoxicity (FEC), Marine ecotoxicity (MEC), Ionising radiation (IR), Agricultural land occupation (ALO), Urban land occupation (ULO), Natural land transformation (NLT), …	-	-	1 kg of cut pork (fresh or frozen)	Cradle-to-gate	Primary data obtained from questionnaires, Secondary data: ecoinvent® database	SimaPro v8.2 software, ReCiPe Midpoint method	-	-	-
52	Oldfield T.L., Achmon Y., Perano K.M., Dahlquist-Willard R.M., VanderGheynst J.S., Stapleton J.J., Simmons C.W., Holden N.M.,	2017	A life cycle assessment of biosolarization as a valorization pathway for tomato pomace utilization in California	Journal of Cleaner Production, 141, pp. 146-156. DOI: 10.1016/j.jclepro.2016.09.051	California	Agriculture	Tomato	E	LCA	-	-	Primary Energy Demand (PED) and Global Warming Potential (GWP)	-	-	1 t of tomato pomace	The system boundary include a feed system and a pest management system. The upstream burden was excluded for the feed system and the starting point of the analysis was transportation of feed from a processing facility, while the downstream boundary for the feed system was curtailed before cattle production.	Data from ﬁeld and laboratory trials, Literature, Background data: Ecoinvent 3.1 and GaBi 6 database	GaBi v.6 software, CML 2001 method +	-	-	-
53	Oldfield T.L., White E., Holden N.M.,	2018	The implications of stakeholder perspective for LCA of wasted food and green waste	Journal of Cleaner Production, 170, pp. 1554-1564. DOI: 10.1016/j.jclepro.2017.09.239	Ireland	Wastes	Food waste: wasted food (avoidable food waste) and green waste (known as domestic garden waste)	E	LCA	Stakeholder analysis	-	Climate change (CC), acidiﬁcation (A) and eutrophication (E)	-	-	1 kg of organic waste entering the waste management system; 1 kg of available nitrogen	The choice system boundary depend on stakeholder perception	Background data: GaBi 6 database and Ecoinvent; Foreground data: peer-reviewed journals and statistics	GaBi 6 software, CML midpoint method	-	-	-
54	Palmieri, N; Suardi, A; Alfano, V; Pari, L	2020	Circular Economy Model: Insights from a Case Study in South Italy	Sustainability, 12 (8), art. no 3466. DOI: 10.3390/su12083466	Italy (Apulia)	Biomass	Olive	F	GHG emissions	Economic analysis: ROI and ROE ratio; Coefficiency ratio: the ratio between economic value and environmental impact of ﬁrms	-	-	-	-	-	-	-	-	-	-	-
55	Pérez-Camacho M.N., Curry R., Cromie T.,	2018	Life cycle environmental impacts of substituting food wastes for traditional anaerobic digestion feedstocks	Waste Management, 73, pp. 140-155. DOI: 10.1016/j.wasman.2017.12.023	Ireland	Biomass	Maize/grass silage and cattle manure	E, F	LCA	-	-	Climate change, Ozone depletion potential (ODP), Terrestrial acidiﬁcation (Acidiﬁcation Potential, AP), Freshwater and marine eutrophication (Eutrophication potentials, EP), Human toxicity and ecotoxicities, Photochemical oxidant formation, Particulate matter formation, Ionising radiation, Agricultural and urban land occupation, Natural land transformation, Water, metal and fossil depletion	-	-	1 MWh of electricity production	From grass silage and cattle slurry production to production of electricity and heat; From transport to feedstock to facility, and to production of electricity and heat	Primary data from operational plant, Ecoinvent database 3.3	SimaPro version 8.3 software, ReCiPe method (midpoint level)	-	-	-
56	Piezer K., Petit-Boix A., Sanjuan-Delmás D., Briese E., Celik I., Rieradevall J., Gabarrell X., Josa A., Apul D.,	2019	Ecological network analysis of growing tomatoes in an urban rooftop greenhouse	Science of the Total Environment, 651, pp. 1495-1504. DOI: 10.1016/j.scitotenv.2018.09.293	-	Agriculture	Tomato	C	LCA	Ecological network analysis (ENA)	-	Primary energy demand (PED)	-	-	1 kg of beef tomatoes grown in a hydroponic system	The greenhouse structure was assessed from cradle to grave and the tomato production, from cradle to farm gate	Background data: Gabi 6 professional database; Literature	Gabi software	-	-	-
57	Qin Z., Sun M., Luo X., Zhang H., Xie J., Chen H., Yang L., Shi L.,	2018	Life-cycle assessment of tobacco stalk utilization	Bioresource Technology, 265, pp. 119-127. DOI: 10.1016/j.biortech.2018.05.110	China	Wastes	Tobacco	E	LCA	-	-	Acidiﬁcation (AD), Ecotoxicity (ET), Eutrophication (EU), Global Warming Air, excl. biogenic carbon (GWA-e), Global Warming Air, incl. biogenic carbon (GWA), Human Health Particulate Air (HHPA), Human toxicity, cancer (HTC), Human toxicity, non-canc. (HTN), Ozone Depletion Air (ODA), Resources, Fossil fuels (RFF), Smog Air (SA).	-	-	1 ton of tobacco stalk	System boundaries were set using a cradle-to-grave approach. The entire process takes into account all aspects of PNT production from raw material procurement to disposal.	Literature, Field investigation, Eco-invent database 3.1	GaBi CML2001 software, TRACI method (midpoint level)	-	-	-
58	Roffeis M., Almeida J., Wakefield M.E., Valada T.R.A., Devic E., Koné N., Kenis M., Nacambo S., Fitches E.C., Koko G.K.D., Mathijs E., Achten W.M.J., Muys B.,	2017	Life cycle inventory analysis of prospective insect based feed production in West Africa	Sustainability (Switzerland), 9 (10), art. no. 1697. DOI: 10.3390/su9101697	West Africa	Livestock or poultry	Musca domestica and Hermetia illucens	E	LCA	-	-	Waste water, Emission CH4 (to air), Emission N2O (to air), Emission NH3 (to air), Volatile solids (to air)	-	-	1 kg whole dried larvae with a residual water content of less than 10%	Cradle to gate: sourcing of raw materials (i.e., rearing substrates) and intermediate factors of production (e.g., auxiliary materials and operating materials), insect rearing and residual substrate separation and processing of the ﬁnal co-products	Foreground Data: On-site surveys, Background Data: literature and Ecoinvent 3.0 database	-	-	-	-
59	Roffeis M., Fitches E.C., Wakefield M.E., Almeida J., Alves Valada T.R., Devic E., Koné N.G., Kenis M., Nacambo S., Koko G.K.D., Mathijs E., Achten W.M.J., Muys B.,	2020	Ex-ante life cycle impact assessment of insect based feed production in West Africa	Agricultural Systems, 178, art. no. 102710. DOI: 10.1016/j.agsy.2019.102710	West Africa	Livestock or poultry	Musca domestica and Hermetia illucens	E	LCA	-	-	MIDPOINT LEVEL: Climate change (GWP), Ozone depletion (ODP), Terrestrial acidification (TAP), Freshwater eutrophication (FEP), Marine eutrophication (MEP), Human toxicity (HTP), Photochemical oxidant form. (POFP), Particulate matter form. (PMFP), Terrestrial ecotoxicity (TETP), Freshwater ecotoxicity (FETP), Marine ecotoxicity (METP),Ionising radiation (IRP), Agricultural land occupation (ALOP), …	-	-	1 kg whole dried larvae with a residual water content of less than 10%	Cradle to gate: extraction of raw materials, manufacturing of inputs including rearing substrates, the insect rearing and residue substrate separation, and the processing of the final co-products	Foreground Data: Experimental data; Background data: literaure and Ecoinvent (V 3.1) database;	SimaPro® software, ReCiPe method (midpoint and endpoint level)	-	-	-
60	Rufí-Salís M., Brunnhofer N., Petit-Boix A., Gabarrell X., Guisasola A., Villalba G.,	2020a	Can wastewater feed cities? Determining the feasibility and environmental burdens of struvite recovery and reuse for urban regions	Science of the Total Environment, 737, art. no 139783. DOI: 10.1016/j.scitotenv.2020.139783	Spain	Wastes	Struvite recovery	E	LCA	-	-	Global Warming, Freshwater Eutrophication, Marine Eutrophication and Ecotoxicity (product of the sum of marine, terrestrial and freshwater ecotoxicity); Cumulative Energy Demand (CED)	-	-	1 kg of P	It includes the electricity and chemicals used by the process of chemical precipitation, the transport of these chemicals, the transport of the struvite to the agricultural fields and the direct N2O emissions to air and heavy metals to soil caused by fertilization.	Experimental on-site data, Literature, Background environmental data: Ecoinvent 3.5 database	Simapro 9.0 software, ReCiPe 2016 method (midpoint level)	-	-	-
61	Rufí-Salís M., Calvo M.J., Petit-Boix A., Villalba G., Gabarrell X.,	2020b	Exploring nutrient recovery from hydroponics in urban agriculture: An environmental assessment	Resources, Conservation and Recycling, 155, art. no. 104683. DOI: 10.1016/j.resconrec.2020.104683	Spain	Wastes	Tomato	E	LCA	-	-	Global warming (GW), terrestrial acidiﬁcation (TA), freshwater eutrophication (FE) and human toxicity (HT), which is the sum of human carcinogenic and non-carcinogenic toxicities; Fossil resource scarcity (FRS)	-	-	Functional Unit A (FUA) was defined as the recovery of the total phosphorus leached (446.6 g) in a hydroponic tomato crop cycle that produced 1084 kg of tomatoes and lasted 187 days.Functional Unit B (FUB) includes the results from FUA plus the nutritional adjustments needed to meet the entire tomato crop’sP (1.8 kg), K (17.7 kg), Mg (0.7 kg) and Ca (9.7 kg) nutritional require- ments	Include the materials, electricity, chemicals and transport required for all alter- natives to recover the amount of nutrients defined in the functional units. No crop operations are included.	Primary data, Literature, Background environmental data: Ecoinvent 3.5 database	Simapro 9.0 software, ReCiPe 2016 Midpoint method	-	-	-
62	Rufí-Salís M., Petit-Boix A., Villalba G., Sanjuan-Delmás D., Parada F., Ercilla-Montserrat M., Arcas-Pilz V., Muñoz-Liesa J., Rieradevall J., Gabarrell X.,	2020c	Recirculating water and nutrients in urban agriculture: An opportunity towards environmental sustainability and water use efficiency?	Journal of Cleaner Production, 261, art. no. 121213. DOI: 10.1016/j.jclepro.2020.121213	Spain	Wastes	Green bean	E	LCA	-	-	Global Warming (GW), Terrestrial Acidiﬁcation (TA), Freshwater Eutrophication (FE), Marine Eutrophication (ME), Fossil Resource Scarcity (FRS) and Ecotoxicity (ET) (which includes Marine, Terrestrial and Freshwater Ecotoxicity).	-	-	1 kg of beans produced	Cradle to grave	Literature, Ecoinvent 3.5 database	Simapro 9.0 software, ReCiPe Midpoint method	-	-	-
63	Ruiz-Peñalver S.M., Rodríguez M., Camacho J.A.,	2019	A waste generation input output analysis: The case of Spain	Journal of Cleaner Production, 210, pp. 1475-1482. DOI: 10.1016/j.jclepro.2018.11.145	Spain	Wastes	Beverages and tobacco and other no-food goods	A	Input-output based hybrid LCA model	-	-	-	-	-	-	-	-	-	-	-	-
64	Santagata R., Ripa M., Ulgiati S.,	2017	An environmental assessment of electricity production from slaughterhouse residues. Linking urban, industrial and waste management systems	Applied Energy, 186, pp. 175-188. DOI: 10.1016/j.apenergy.2016.07.073	Italy (Campania)	Biomass	Animal waste	F	LCA	-	-	Global Warming Potential (GWP), Human Toxicity Potential (HTP), Fossil Depletion Potential (FDP), Metal Depletion Potential (MDP), Water Depletion Potential (WDP), Freshwater Eutrophication Potential (FEP), Terrestrial Acidiﬁcation Potential (TAP), Terrestrial Ecotoxicity Potential (TEP), Photochemical Oxidant Formation Potential (POFP).	-	-	1 MWh of electric energy produced	Gate to gate	Primary data: direct measurements and estimations by experts. Background data: Ecoinvent v3.0 database	Software SimaPro 8.0.5.13, ReCiPe Midpoint method	-	-	-
65	Santagata R., Zucaro A., Viglia S., Ripa M., Tian X., Ulgiati S.,	2020	Assessing the sustainability of urban eco-systems through Emergy-based circular economy indicators	Ecological Indicators, 109, art. no. 105859. DOI: 10.1016/j.ecolind.2019.105859	Italy (Campania)	Biomass	Waste cooking oil, animal waste, agro-waste residues	E, F	-	Emergy Accounting method (EMA)	-	-	Emergy Yield Ratio, Environmental Load-ing Ratio, Renewable fraction of emergy used, Empower Density, Population emergy intensity	Micro	-	-	-	-	-	-	-
66	Santiago B., Arias Calvo A., Gullón B., Feijoo G., Moreira M.T., González-García S.,	2020	Production of flavonol quercetin and fructooligosaccharides from onion (Allium cepa L.) waste: An environmental life cycle approach	Chemical Engineering Journal, 392, art. no. 123772. DOI: 10.1016/j.cej.2019.123772	Spain	Wastes	Onion	E	LCA	-	-	Global warming, potential (GWP), acidification potential (AP), eutrophication potential (EP), ozone layer depletion potential (ODP) and photochemical oxidation potential (POP); Cumulative energy demand (CED)	-	-	1 kg of product obtained (quercetin or fructooligosaccharides)	Cradle-to-gate	Primary data-, Secondary data: Ecoinvent® database version 3.5	SimaPro v9.0.0 software, Aspen Plus® software, CML 2001 method	-	-	-
67	Schmidt Rivera X.C., Gallego-Schmid A., Najdanovic-Visak V., Azapagic A.,	2020	Life cycle environmental sustainability of valorisation routes for spent coffee grounds: From waste to resources	Resources, Conservation and Recycling, 157, art. no. 104751. DOI: 10.1016/j.resconrec.2020.104751	UK	Biomass	Coffee	F	LCA	-	-	Climate change (CC), fossil depletion (FD), metal depletion (MD), fine particulate matter formation (PM), stratospheric ozone depletion (OD), photochemical oxidant - ecosystems (POFe), photochemical oxidant - humans (POFh), freshwater eutrophication (FE), marine eutrophication (ME), terrestrial acidification (TA) human toxicity, cancer (HTc), human toxicity, non-cancer (HTn-c), freshwater ecotoxi…	-	-	1 tonne of spent coffee grounds	cradle to grave	Background data: Ecoinvent 3.3 database. Literature.	GaBi 8.7 software, Recipe 2016 method +PED	-	-	-
68	Schmidt Rivera X.C., Leadley C., Potter L., Azapagic A.,	2019	Aiding the design of innovative and sustainable food packaging: Integrating techno-environmental and circular economy criteria	Energy Procedia, 161, pp. 190-197. DOI: 10.1016/j.egypro.2019.02.081	UK	Manufacturing	Raspberries and meat	F, B	LCA	-	Amount of material, Mono or multi components, Recycling content, Reuse rate, Current waste management, Current recycling rate, Potential recyclability, Use of renewable materials, Use of renewable energy	Climate change, Depletion of fossil fuels, Depletion of metals; Primary energy demand (PED)	-	Micro	-	-	-	Climate change, Depletion of fossil fuels, Depletion of metals + PED	-	-	-
69	Sierra-Perez, J; Garcia-Perez, S; Blanc, S; Boschmonart-Rives, J; Gabarrell, X	2018	The use of forest-based materials for the efficient energy of cities: Environmental and economic implications of cork as insulation material	SUSTAINABLE CITIES AND SOCIETY, 37 pp. 628-636. DOI: 10.1016/j.scs.2017.12.008	Spain	Manufacturing	Cork	A	LCA	Economic analysis: Analysis of the production costs, Price comparison analysis.	-	Climate Change (CC), Ozone Depletion Potential (ODP), Terrestrial Acidiﬁcation Potential (TAP), Freshwater Eutrophication Potential (FEP), Marine Eutrophication Potential (MEP), Human Toxicity Potential (HTP), Photochemical Oxidant Formation Potential (PCOP), Water Depletion Potential (WDP), Metal Depletion Potential (MDP) and Fossil Depletion Potential (FDP); Cumulative Energy Demand (CED)	-	-	Quantity of product to insulate one square meter providing a thermal resistance R-value of 1 m2 K/W	The system boundaries began in the forest where the raw cork is extracted, and ended when the product is produced and packed ready to distribute at production plant.	Data obtained from questionnaires; Ecoinvent 3.1 database	Simapro software, ReCiPe 2008 method	-	-	-
70	Slorach P.C., Jeswani H.K., Cuéllar-Franca R., Azapagic A.,	2019a	Environmental sustainability of anaerobic digestion of household food waste	Journal of Environmental Management, 236, pp. 798-814. DOI: 10.1016/j.jenvman.2019.02.001	UK	Biomass	Food waste	F	LCA	-	-	Global warming potential; fossil depletion; metal depletion; freshwater ecotoxicity; marine ecotoxicity; terrestrial ecotoxicity; human toxicity; marine eutrophication; freshwater eutrophication; terrestrial acidification; particulate matter formation; photochemical oxidants formation; ozone depletion; agricultural land occupation; urban land occupation; natural land transformation; ionising radi…	-	-	1 tonne of household food waste; 1 MWh of net electricity	The scope of the study is from the point of waste generation in the household to end-of-life of resources and materials produced by AD, including: collection and transport of food waste to the AD facility; construction of AD and CHP plants; anaerobic digestion of waste; combustion of biogas in the CHP plant to generate electricity and heat; and transportation and application of digestate for use …	Site-specific data, Literature and the Ecoinvent database V3.3	GaBi V8 software, ReCiPe method (midpoin level)	-	-	-
71	Slorach P.C., Jeswani H.K., Cuéllar-Franca R., Azapagic A.,	2019b	Energy demand and carbon footprint of treating household food waste compared to its prevention	Energy Procedia, 161, pp. 17-23. DOI: 10.1016/j.egypro.2019.02.053	UK	Biomass	Food waste	A, F	LCA	-	-	Primary energy demand (PED) and carbon footprint	-	-	Treatment or prevention of 1 tonne of household food waste	From the agricultural production of the food to the end of life of any products or resources produced via the waste treatment routes. This includes the agriculture, food processing, transportation, packaging, food use, waste collection, waste treatment process and the environmental credits for any waste-derived products.	Site-specific data, Ecoinvent database	GaBi V8.6 software, ReCiPe method, Thinkstep method	-	-	-
72	Slorach, PC; Jeswani, HK; Cuellar-Franca, R; Azapagic, A	2019c	Environmental and economic implications of recovering resources from food waste in a circular economy	Science of the Total Environment, 693, art. no 133516. DOI: 10.1016/j.scitotenv.2019.07.322	UK	Wastes and Biomass	Food waste	E, F	LCA and LCC	-	-	Global warming potential; fossil depletion; metal depletion; freshwater ecotoxicity; marine ecotoxicity; terrestrial ecotoxicity; human toxicity; marine eutrophication; freshwater eutrophication; terrestrial acidification; particulate matter formation; photochemical oxidants formation; ozone depletion; agricultural land occupation; urban land occupation; natural land transformation; ionising radi…	-	-	1 tonne of household food waste with recovery of resources	Food waste collection fromhouseholds, its treatment by one of the above-mentioned methods and recovery of energy and/or materials. Construction of the treatment plants has also been considered but their decommissioning and the resulting waste are excluded. The FWis considered burden-free	Primary data: from operators of the treatment plants; Background data: Ecoinvent database V3.3; literature	Hierarchist ReCiPe1.08 impact assessment method; GaBi V8 software	Guidelines published by Swarr et al. (2011) and Hunkeler et al. (2008)	Costs to local authorities, operators of treatment facilities and consumers	Literature, Statistics
73	Smol M., Kulczycka J., Lelek Ł., Gorazda K., Wzorek Z.,	2020	Life Cycle Assessment (LCA) of the integrated technology for the phosphorus recovery from sewage sludge ash (SSA) and fertilizers production	Archives of Environmental Protection, 46 (2), pp. 42-52. DOI: 10.24425/aep.2020.133473	Poland	Wastes	P-based fertilizers	E	LCA	-	-	Climate change [GWP100], Ozone layer depletion [OLD], Human toxicity: non-cancer eﬀ ects [HT NCE] and cancer eﬀ ects [HT CE], Particulate matter [PM], Ionizing radiation: human health [IRHH] and E (interim) [IR E], Photochemical ozone formation [POF], Acidiﬁ cation [AC], Terrestrial eutrophication [TEU], Freshwater eutrophication [FWEU], Marine eutrophication [MEU], Freshwater eco-toxicity [FEW],…	-	-	1 Mg P2O5 contained in the fertilizer	Cradle to gate	Ecoinvent database, v.3.2	SimaPro LCA software, ILCD 2011 Midpoint+ method	-	-	-
74	Stanchev P., Vasilaki V., Egas D., Colon J., Ponsá S., Katsou E.,	2020	Multilevel environmental assessment of the anaerobic treatment of dairy processing effluents in the context of circular economy	Journal of Cleaner Production, 261, art. no. 121139. DOI: 10.1016/j.jclepro.2020.121139	UK	Biomass	Dairy	F	LCA and MFA	-	Material circularity performance indicator (MCPI)	Environmental circularity performance indicator (ECPI)	-	Micro	1 m³ of wastewater on the input of the AD; 1 kg of processed raw milk	Level 1: AD treatment plant; Level 2: Dairy processing factory; Level 3: The entire dairy supply chain - from the raw inputs in the farm stage to the dairy products distribution to the end customers.	Primary data: Dairy factory; Secondary data: Ecoinvent® database; literature	ReCiPe Midpoint (H) 1.12 method; SimaPro v8.0.5.13	-	-	-
75	Strazza C., Magrassi F., Gallo M., Del Borghi A.,	2015	Life Cycle Assessment from food to food: A case study of circular economy from cruise ships to aquaculture	Sustainable Production and Consumption, 2, pp. 40-51. DOI: 10.1016/j.spc.2015.06.004	UK and Norway	Fishery and Aquaculture	Salmon breeding	B	LCA	-	-	Global warming potential (GWP), non-renewable energy demand (NRED), and water scarcity index (WSI).	-	-	1 tonne of proteins contained by the feed products	cradle-to-gate	Foreground data: literature. Data from experimental tests; Background data: Ecoinvent database v.3.1, literature, Agri-footprint database.	SimaPro v.8.0.2 software; IPCC report (GWP)	-	-	-
76	Svanström M., Heimersson S., Peters G., Harder R., I'Ons D., Finnson A., Olsson J.,	2017	Life cycle assessment of sludge management with phosphorus utilisation and improved hygienisation in Sweden	Water Science and Technology, 75 (9), pp. 2013-2024. DOI: 10.2166/wst.2017.073	Sweden	Wastes	P-based fertilizers	E, F	LCA	-	-	Global warming, acidiﬁcation, eutrophication (for marine, freshwater and terrestrial ecosystems) and photo oxidant formation potential.	-	-	1 tonne of dry solids of undigested sludge	Cradle to grave	Gabi professional database	GaBi software, ILCD method	-	-	-
77	Tedesco D.E.A., Conti C., Lovarelli D., Biazzi E., Bacenetti J.,	2019	Bioconversion of fruit and vegetable waste into earthworms as a new protein source: The environmental impact of earthworm meal production	Science of the Total Environment, 683, pp. 690-698. DOI: 10.1016/j.scitotenv.2019.05.226	Italy (Lombardy)	Wastes	Earthworm meal	B, E	LCA	-	-	Climate change (CC), Ozone depletion (OD), Human toxicity midpoint, cancer effects (HT-c) and non-cancer effects (HT-noc) USEtox, Ecotoxicity freshwater (FEx), midpoint USEtox, Particulate matters (PM), midpoint RiskPoll model (Rabl and Spadaro, 2004 and Greco et al., 2007), Photochemical ozone formation (POF), Acidiﬁcation (TA), Eutrophication terrestrial (TE), Eutrophication aquatic freshwater/…	-	-	1 kg of dried meal of earthworm	cradle to gate	Primary data: interviews with the farmer; Secondary data: Ecoinvent database	ILCD midpoint method	-	-	-
78	Uceda-Rodríguez M., López-García A.B., Moreno-Maroto J.M., Cobo-Ceacero C.J., Cotes-Palomino M.T., García C.M.,	2020	Evaluation of the environmental benefits associated with the addition of olive pomace in the manufacture of lightweight aggregates	Materials, 13 (10), art. no. 2351. DOI: 10.3390/ma13102351	Spain	Manufacturing	Olive	E	LCA	-	-	Abiotic Depletion, Acidiﬁcation, Eutrophication, Global Warning Potential, One-Layer Depletion, Human Toxicity, Fresh Water Aquatic Ecotox, Marine Aquatic Ecotoxicity, Terrestrial Ecotoxicity and Photochemical Oxidation.	-	-	1 kg of artificial lightweight aggregates	cradle-to-door approach: Raw material, extraction, transport of the raw material, manufacture of the final product.	data measured in the laboratory, literature; background data: Ecoinvent v.3.2 database	SimaPro version 8.3.0.0 software, CML 2000 (midpoint level)	-	-	-
79	Vaneeckhaute C., Styles D., Prade T., Adams P., Thelin G., Rodhe L., Gunnarsson I., D'Hertefeldt T.,	2018	Closing nutrient loops through decentralized anaerobic digestion of organic residues in agricultural regions: A multi-dimensional sustainability assessment	Resources, Conservation and Recycling, 136, pp. 110-117. DOI: 10.1016/j.resconrec.2018.03.027	Sweden	Biomass	Pig	F	LCA	NPV, IRR, stakeholder perception inquiry	-	Global warming potential (GWP), eutrophication potential (EP), acidiﬁcation potential (AP), and fossil resource depletion potential (FRDP)	-	-	1 Mg dry matter (DM) of residue biofertilizers	Expanded boundary	Measurement data, literature, Ecoinvent v3.0 database	LCAD EcoScreen tool, CML 2010	-	-	-
80	Wohner B., Gabriel V.H., Krenn B., Krauter V., Tacker M.,	2020	Environmental and economic assessment of food-packaging systems with a focus on food waste. Case study on tomato ketchup	Science of the Total Environment, 738, art. no. 139846. DOI: 10.1016/j.scitotenv.2020.139846	Austria	Manufacturing	Tomato	A, B	Streamlined LCA: The use of recycled content and the disposal of the packaging was modelled according to the Circular Footprint Formula listed in the PEF guidance; LCC (value added, VA)	Multi-criteria decision analysis, Technique for Order by Similarity to Ideal Solution (TOPSIS)	-	Climate change (CC), Resource use, fossils (FRD), Water use (WU), Eutrophication, freshwater (FEU), Acidiﬁcation (AC), Particulate matter (PM)	-	-	Consumption of 3.8 kg ketchup	System boundaries include: Packaging, Ketchup processing, Transport of the ﬁnal product, Food loss and waste	OpenLCA 1.7.4 and the Ecoinvent 3.5 database	IPCC 2013, CML 2002, Available Water Remaining (AWARE), EUTREND model, Accumulated Exceedance, PM method	Value added approach (VA)	Costs to the ketchup producer for purchasing ingredients, energy and packaging, VA of agricultural produc-tion of ingredients, energy and packaging, transports	Ecoinvent 3.5 database version of OpenLCA
81	Wohner B., Schwarzinger N., Gürlich U., Heinrich V., Tacker M.,	2019	Technical emptiability of dairy product packaging and its environmental implications in Austria	PeerJ, 2019 (9), art. no. e7578. DOI: 10.7717/peerj.7578	Austria	Manufacturing	Dairy	A	Streamlined LCA: allocation procedures follow the rules of the Circular Footprint Formula presented in the PEF guidance	-	-	Freshwater and terrestrial acidiﬁcation, Respiratory effects, inorganics, Climate change, Terrestrial eutrophication, Freshwater eutrophication, Resource use, fossils	-	-	1 kg of consumed dairy product at room or refrigerator temperature in the home of the consumer	The system boundaries of the streamlined LCA include the raw materials, manufacturing and transport of packaging with all its components, the agricultural production and processing of milk and other ingredients, as well as the disposal of the packaging including the food residues inside	OpenLCA 1.7.4 and the Ecoinvent 3.5 database	ILCD 2018 method	-	-	-
82	Wolsey M., Smyth B., Johnston C.,	2018	Biomass for heat generation and wastewater management in the agri-food sector –Are circular economy benefits realised?	European Biomass Conference and Exhibition Proceedings, 2018 (26thEUBCE), pp. 107-113.	Ireland	Wastes and Biomass	Willow biomass	F	LCA	-	-	Energy balance and CO2 emissions	-	-	Energy input or output per ha per year, i.e. MJ/ha/yr; kgCO2e/ha/yr was chosen for assessing the GHG	Emissions from electricity consumed, leaf litter and from the effluent were included	Site-specific data, Literature and the Ecoinvent database V3.3	-	-	-	-
83	Xue Y.-N., Luan W.-X., Wang H., Yang Y.-J.,	2019	Environmental and economic benefits of carbon emission reduction in animal husbandry via the circular economy: Case study of pig farming in Liaoning, China	Journal of Cleaner Production, 238, art. no. 117968. DOI: 10.1016/j.jclepro.2019.117968	China	Livestock or poultry	Pig	F	LCA, Carbon footprint	-	-	Carbon emission reduction in the circular model	-	-	A biogas-based circular model of large- scale farms in Liaoning Province for one year	Cradle-to-grave semi-life cycle: Biogas facility, Biogas use, Waste disposal, Fertilizer replacement, Coal replacement	-	-	-	-	-
84	Zhang J., Jia C., Wu Y., Xia X., Xi B., Wang L., Zhai Y.,	2017	Life cycle energy efficiency and environmental impact assessment of bioethanol production from sweet potato based on different production modes	PLoS ONE, 12 (7), art. no. e0180685. DOI: 10.1371/journal.pone.0180685	China	Biomass	Potato	F	Energy efficiency analysis: Net energy ratio (NER) and net energy gain (NEG)	-	-	Global warming potential (GWP), photochemical oxidation potential (POCP), acidification potential (AP), eutrophication potential (EP), and human toxicity potential (HTP)	-	-	1000L of 99.5% bioethanol production from sweet potato	The product system includes three units: the plant cultivation unit, the feedstock transport unit and the bioethanol conversion unit	Data from enterprise investigation and interviews with farmers, literature, CML-IA 2000 database	CML-IA 2000 method	-	-	-

## Sheet: Table S2
	Table S2. Fields of application.
	Main argument or topic of study; area of human activity; context in which the application is implemented; phases of a supply chain; specific phase of a product or service life cycle	Examples: goods, commodities or activities
	Agriculture	Production of fruits and vegetables for fresh consumption or industrial transformation (raw materials, food and no food). Organic agriculture, conventional agriculture, integrated agriculture, urban agriculture, alternative food networks, farming operations.
	Livestock or poultry	Animal feeding, husbandry, breeding, rearing. Meat production as raw material.
	Fishery and aquaculture	Harvesting, processing, marketing and farming of fish, crustaceans, molluscs, aquatic plants, algae, and other organisms; marine farming. For recreational, subsistence and commercial purposes.
	Biomass	Wood, garbage, crops, fruits, litter, manure, landfills gas, every kind of wastes, for energetic purposes (anaerobic digestion, biogas, bioenergy, biofuel, etc.)
	Manufacturing	Any industry that makes products from raw materials (renewable or not) by the use of manual labour or machinery on a large scale. Transportation equipment and vehicles, electronics, chemicals, pharmaceuticals, paper, printing, industrial equipment, furniture, building materials, fashion industry, crafts, household goods, furnishing, packaging (all wrapping or bottling material), synthetic materia…
	Food products	Processed fruit (juices, marmalade, etc.) and vegetables (sauces, pasta, baked products, flours, etc.), processed fish products, milk, cheese, yogurt, butter, meat, sausages, cured meat
	Wastes	Use and recycling of household wastes, wastewater, agricultural wastes, food waste, organic waste. Included recovery of nutrients, organic compounds, and energy.
	Biochemical products, biocomposite products, nutrients	Production of nutrients and other organic compounds from raw organic materials, except from wastes
	Ho.Re.Ca and other forms of food distribution and consumption	-

## Sheet: Table S3
	Table S3. Circularity topics.
	#ID	Circularity topics	Definitions and examples
	A	Reduction	Diminishing the quantities of input, final wastes or product losses.
	B	Recycle	Turning an item (products, co-products, by-products) into raw materials that can be used again, usually for a completely new product. Example: composting, packaging recycling. Energetic purposes are excluded.
	C	Reuse, repurpose, remanufacture, regeneration	The re-use of products or discarded objects for the same function or for a different one, through their maintenance or changing some parts, making them suitable for the same or a new purpose and reintroduce them into the economic-productive system. Example: plastics from renewable biomass sources, repurpose of wooden pallets.
	D	By-products and co-products valorization	Making marketable a sub-product resulting from a process. Examples: crop residues used for fertilization, dairy by-products for livestock feeding.
	E	Waste valorization	Retrieve elements from wastes or losses to be used for new purposes, such as extraction of biochemical feedstock and nutrients recovery. Energetic purposes excluded.
	F	Energy recovery	Incineration of material, usually biomass, with energy recovery; composting for energetic purposes; anaerobic digestion.
